# Supplementary material for: Hypoxia-induced microRNA-155 overexpression in extracellular vesicles promotes renal cell carcinoma progression by targeting FOXO3
Source: Aging (Albany NY). 2021 Mar 19;13(7):9613–26. doi: 10.18632/aging.202706 (PMC8064184; doi:10.18632/aging.202706)
Supplement: Supplementary Table 1 [file aging-13-202706-s001.xlsx]

## Sheet: RCC group
Sample Number							Sex(male=1 female=2)	Age				局部侵袭							Hepatic Function					GLU	Renal Function			Routine Urine Test
	Number	miR484	miR155	ΔCT	Median(Control Group)	2-ΔΔCT			Fuhrman Classification	Fuhrman Classification（1+2=1,3+4=2)	Size(cm)	肾盂输尿管	肾被膜	肾周脂肪	肾上腺	肾静脉癌栓	AJCC Caner Stage	AJCC Cancer Stage (1+2=1,3+4=2)	ALT	AST	ALB	Cho	TG		Creatinine	Urea Nitrogen	Cystatin C	WBC	RBC
R1	1	26.2644	35.45	9.18555	12.41	9.34664	1	2	2	2	2						2	2	88	38	41.7	3.32	0.7	5.36	72	5.15	0.74	3.6	16.4
R2	2	26.72	35.98	9.26004	12.41	8.87632	1	1	2	2	2						1	2	17	21	27.7	2.99	0.32	7.04	57	3.69	0.58	3.3	15.4
R3	3	26.26	37.09	10.83	12.41	2.98961	1	2	2	1	1		紧邻肾被膜				1	1	20	30	47.3	2.73	0.66	6.56	73	5.03	0.77	1.6	13.1
R4	4	26.5025	38.33	11.8275	12.41	1.49744	2	1	2	1	1						1	1	11	12	44.7	5.28	0.66	4.82	53	2.63	0.55	3.1	14.1
R5	5	25.9337	37.99	12.0563	12.41	1.27785	2	1	2	1	2	累及肾盂					1	1	12	16	40.1	4.63	1.33	5.99	59	4.95	1.16	16.1	15
R6	6	25.9544	38.22	12.2656	12.41	1.10526	1	1	2	1	1		紧邻肾被膜				1	1	31	19	47.9	4.68	1.52	5.48	74	6.7	0.74	3.7	12
R7	7	26.5387	38.76	12.2213	12.41	1.13975	1	1	2	1	1						1	1	20	16	49.2	3.25	0.53	4.02	80	5.1	0.7	1.4	2.1
R8	8	26.7272	37.49	10.7628	12.41	3.13232	2	2	2	1	1						1	1	12	14	44.6	5.51	1.97	5.05	53	5.3	0.65	6.2	4.2
R9	9	27.1902	38.22	11.0298	12.41	2.60299	1	1	2	1	1		紧邻肾被膜				1	1	56	30	45.5	4.11	0.83	4.76	75	4.7	0.51	7.1	9.7
R10	10	27.04	37.99	10.95	12.41	2.75112	1	2	2	1	1						1	1	15	21	47.5	3.67	0.81	5.24	73	5.17	0.72	1.8	8.9
R11	11	27.1336	38.11	10.9764	12.41	2.70115	2	2	3	2	2						1	2	12	21	45.9	4.72	0.86	4.66	67	7.3	0.7	31	6.7
R14	12	26.4911	35.86	9.36893	12.41	8.231	1	2	2	2	2					右肾静脉及下腔静脉癌栓	3	2	8	11	36.9	3.85	1.25	8.76	87	4.4	1.04	9.1	21.2
R15	13	25.414	38.2	12.786	12.41	0.77055	1	1	2	1	1						1	1	12	17	43.2	3.27	0.74	5.69	89	4.86	0.67	6.2	0.5
R20	14	25.2415	34.74	9.4985	12.41	7.52401	1	2	2	2	1				+		4	2	39	42	41.9	4.79	1.29	4.82	72	4.62	0.77	11.7	10
R21	15	25.9371	37.88	11.9429	12.41	1.38231	1	2	2	1	1						1	1	16	11	45.9	3.41	2.46	5.91	79	5.79	0.82	3.3	3.1
R22	16	25.8928	38.16	12.2672	12.41	1.10406	2	1	1	1	1						1	1	9	17	42.4	4.04	0.59	4.82	51	3.37	0.49	30	61.6
R23	17	25.8326	35.86	10.0274	12.41	5.21492	2	2	2	2	2						2	1	5	12	40	4.41	1.72	4.69	68	4.1	0.89	17.4	17.2
R24	18	26.4908	37.97	11.4792	12.41	1.9063	1	2	2	1	1	邻近肾盂组织	侵及肾被膜				1	1	24	29	36.6	4.28	0.99	5.47	76	5.08	1.08	3.3	5.1
R26	19	24.1177	33.27	9.15233	12.41	9.56438	1	2	2	2	2						4	2	17	11	30	4.31	0.71	4.42	54	3.8	0.7	1.9	3.2
R27	20	24.0935	36.66	12.5665	12.41	0.897173	1	2	2	1	1		侵及肾被膜				1	1	10	13	40.3	2.98	1.45	5.31	72	4.55	0.86	0.7	3.2
R28	21	24.8536	33.99	9.13639	12.41	9.67065	1	2	2	2	2					肾静脉及下腔静脉癌栓	4	2	6	16	41.7	3.66	0.82	4.19	98	5	1.09	3.5	10.6
R29	22	24.2477	35.99	11.7423	12.41	1.58848	1	2	4	2	2						2	1	19	18	31	3.13	0.6	5	116	4.17	0.93	21.6	5.9
R31	23	23.6672	37.34	13.6728	12.41	0.416746	1	2	2	1	1						1	1	12	19	40.7	5.09	0.96	9.84	60	4.74	0.52	1.5	5.1
R32	24	24.8018	36.26	11.4582	12.41	1.93426	1	1	2	1	2						1	1	33	21	45.5	4.28	1.66	6.17	64	4.56	0.67	6	2
R34	25	24.968	34.76	9.79205	12.41	6.13878	1	1	2	1	1						1	1	30	20	46.9	4.84	2.67	5.05	87	8.04	0.76	6.3	5.2
R35	26	25.0097	34.87	9.86028	12.41	5.85522	1	1	3	2	1						1	1	15	19	42.2	3.97	0.99	5.82	63	8.34	0.53	13.6	3.1
R36	27	24.854	34.99	10.136	12.41	4.83656	1	1	2	2	2						4	2	9	16	42.5	4.04	0.48	4.89	85	5.95	0.82	39.2	1.6
R37	28	24.8654	33.99	9.12457	12.41	9.75019	1	1	2	2	2					CT：深静脉内疑似充盈缺损	3	2	16	22	43.5	3.54	1.01	4.76	71	4.3	0.58	0.7	2.3
R38	29	24.5095	36.11	11.6005	12.41	1.75265	1	1	2	1	1						1	1	15	16	43.6	2.85	1.08	4.77	74	3.9	0.7	9.5	10
R39	30	25.1663	34.66	9.4937	12.41	7.54906	1	1	2	1	2						1	1	29	38	42.2	5.24	0.91	5.64	75	6.6	0.61	3.2	6.9
R40	31	24.0057	36.86	12.8543	12.41	0.734928	1	1	2	1	1						1	1	11	14	45.4	4.93	1.14	4.54	75	3.9	0.58	4.5	5.5
R41	32	24.6483	35.76	11.1117	12.41	2.45939	2	1	1	1	1						1	1	9	13	47.2	3.66	0.84	0.49	63	4.2	0.69	3.6	5.6
R43	33	24.7865	34.87	10.0835	12.41	5.01596	2	1	2	1	1		紧邻肾被膜				1	1	10	16	43.8	4.27	0.53	4.79	59	5.2	0.39	12.1	5.7
R45	34	24.8508	34.16	9.30924	12.41	8.57872	1	2	2	1	2						2	2	27	18	35.7	4.04	2.2	4.66	69	8.93	0.68	5.9	4.5
R46	35	23.8222	35.98	12.1578	12.41	1.19106	1	1	2	1	1						1	1	17	17	41.1	4.81	1.14	5.05	73	6.24	0.69	1.5	3.4
R47	36	24.6586	33.9	9.2414	12.41	8.99174	1	2	2	1	2		累及肾被膜				2	2	12	23	34.1	4.06	1.26	4.27	79	2.63	1.18	8.1	10.9
R49	37	25.7947	34.96	9.16527	12.41	9.479	2	2	2	2	1	紧邻肾盂					1	2	15	24	45.1	3.71	1.12	4.95	66	5.52	0.77	4	4.9
R50	38	25.5921	38.2742	12.6821	12.41	0.828141	1	1	3	2	1						1	1	20	25	45	3.92	0.65	4.28	82	5.22	0.52	8.8	11
R51	39	26.3365	39.1974	12.8609	12.41	0.731588	1	1	3	2	1						1	1	14	16	44.7	5.38	2.69	5.1	70	4.52	0.59	8.9	12.11
R53	40	26.0366	38.6581	12.6215	12.41	0.863666	1	1	2	1	1						1	1	15	15	47.8	4.22	1.77	4.18	86	6.5	0.73	8.7	11.99
R54	41	26.2763	39.6805	13.4043	12.41	0.501992	1	1	2	1	2						1	1	19	16	43.6	4.91	1.57	5.22	80	4.7	0.63	6.8	7.6
R55	42	26.1462	38.9653	12.8192	12.41	0.753059	1	1	2	1	1						1	1	16	46	38.4	5.65	1.35	4.89	148	5.21	1.24	8.6	4.9
R57	43	26.362	38.4111	12.0491	12.41	1.28426	1	1	2	1	1						1	1	48	22	45.7	5.04	3.01	5.56	65	5.59	0.9	1.2	72.2
R58	44	26.2295	37.88	11.6505	12.41	1.69286	1	2	1	1	1	邻近肾被膜					1	1	18	28	34.5	3.67	0.8	5.56	74	6.86	0.75	2	4.6
R59	45	26.3973	39.73	13.3327	12.41	0.527512	1	1	2	1	1						1	1	14	24	43.7	5.73	0.83	5.12	86	3.8	0.76	1.9	7.2
R61	46	26.8292	37.03	10.2008	12.41	4.62417	2	1	3	2	2						1	1	10	17	46.8	4.86	1.05	4.59	64	5.7	0.53	59.1	32.8
R63	47	26.0176	38.22	12.2024	12.41	1.15473	1	1	3	2	2						1	1	25	20	49.7	5.81	2.61	8.19	98	6.5	0.69	5.2	1.8
R64	48	26.0551	37.6182	11.5631	12.41	1.79864	2	1	2	1	1						1	1	26	32	46.9	4.38	0.94	5.5	50	3.54	0.49	14.1	1.1
R65	49	26.4581	39.3865	12.9284	12.41	0.698137	1	2	2	1	2						1	1	11	20	37.2	5.05	1.23	5.2	64	4.6	0.69	6.8	2.2
R67	50	25.46	34.77	9.31	12.41	8.57419	1	2	2	1	2	侵及肾盂	紧邻肾被膜				2	2	20	19	35.5	3.35	0.78	7.4	82	5.3	0.94	1.1	0.1
R68	51	25.8446	38.12	12.2754	12.41	1.09778	1	2	2	1	1						1	1	8	14	42.4	4.4	1.4	4.41	58	4.01	0.61	2.3	16
R69	52	26.1218	35.58	9.45816	12.41	7.73738	2	1	2	2	2					下腔静脉癌栓	3	2	18	34	39.3	5.07	1.5	5.91	52	2.72	0.58	15.8	12.3
R70	53	27.523	39.3494	11.8264	12.41	1.49855	1	1	2	1	2						2	1	56	25	47.2	4.17	2.14	5.53	77	6.2	0.67	0.5	0.2
R73	54	26.076	37.7245	11.6486	12.41	1.69516	1	2	2	1	2						1	1	19	26	46.4	4.71	2.41	5.83	81	6.38	0.8	3	4.7
R74	55	27.7675	38.0362	10.2688	12.41	4.41137	1	1	3	2	2				肾上腺查见转移癌	肾静脉癌栓	4	2	37	42	41.9	3.71	0.88	6.3	99	6	0.94	4.6	6.6
R76	56	26.7111	38.8327	12.1216	12.41	1.22131	1	2	2	1	2		紧邻肾被膜				2	1	5	11	41.5	3.78	0.61	4.72	66	4.6	0.69	2.3	4.6
R78	57	27.228	39.1113	11.8833	12.41	1.44062	1	1	2	1	1		紧邻肾被膜 未穿透				1	1	24	23	53.8	4.77	0.48	6.2	78	4.38	0.55	6	3.2
R80	58	28.139	39.5043	11.3653	12.41	2.06289	2	1	2	1	1						1	1	84	42	42.6	5.96	0.9	5.08	69	4.2	0.64	3.1	9.4
R81	59	27.6628	36.87	9.20724	12.41	9.20719	1	2	2	2	2	累及肾盂	累及肾被膜				2	2	14	17	39.4	4.1	1.22	4.98	100	6.59	1.24	11.7	21.1
R84	60	27.3851	38.55	11.1649	12.41	2.37032	1	2	2	1	1						1	1	8	18	45.6	5.37	1.22	5.18	77	5.51	3.69	6.2	9
R85	61	27.5557	38.22	10.6643	12.41	3.35346	1	2	2	1	1						1	2	13	20	44.5	3.73	0.8	5.71	70	4.09	0.72	0.9	6.4
R86	62	27.4638	38.17	10.7062	12.41	3.25763	1	2	3	2	1						1	1	23	21	50.2	5.7	1.79	5.36	59	4.5	0.51	1.1	5.7
R87	63	27.34	38.1994	10.8594	12.41	2.92936	1	1	1	1	1						1	1	20	13	46.1	5.76	1.15	5.03	79	4.55	0.65	6	4.2
R88	64	26.1025	36.87	10.7675	12.41	3.12203	2	1	2	1	1	侵及肾盂	紧邻肾被膜				1	1	14	20	46.4	5.38	0.69	4.86	41	3.4	0.31	2.1	37.9
R89	65	26.979	38.99	12.011	12.41	1.31862	2	1	2	1	2						1	1	38	33	40.6	3.51	0.73	5.99	38	3.7	0.52	19.1	5.5
R90	66	26.0171	39.0577	13.0406	12.41	0.645899	2	2	2	1	2						2	1	17	16	43.8	3.96	2.56	9.15	63	4.9	0.6	5.1	117.5
R92	67	26.3759	37.7983	11.4224	12.41	1.98294	1	2	3	2	2						1	1	29	28	42.8	5.87	2.92	4.77	72	6.65	0.65	1.8	3.7
R93	68	27.0653	39.5533	12.488	12.41	0.947364	2	2	3	2	2						1	1	42	24	46.4	5.66	2.09	16.39	46	2.3	0.67	4.9	7.1
R95	69	24.2318	37.11	12.8782	12.41	0.722875	1	1	2	1	2						1	1	14	16	41.7	5.31	0.85	4.09	82	5.89	0.67	3.1	55.9
R97	70	24.8373	38.5129	13.6756	12.41	0.415934	2	2	2	1	2						4	2	11	16	39.9	5.95	4.61	5.42	59	5.05	1.02	13.7	135.3
R98	71	24.5397	37.7056	13.166	12.41	0.592155	1	2	2	1	2						1	1	9	17	41.1	4.55	0.81	5.57	97	6.82	1.06	3.7	23.7
R99	72	23.6264	37.11	13.4836	12.41	0.475134	1	1	2	1	1						1	1	21	16	47	4.07	1.43	8.98	65	7.11	1.75	2.2	7.3
R100	73	24.082	36.11	12.028	12.41	1.30314	1	1	3	2	2		+	+		+	2	1	25	23	32.5	2.51	0.52	4.63	63	2.37	0.81	5.1	9.8
R103	74	24.7684	36.77	12.0016	12.41	1.3272	1	1	3	2	1						1	1	51	21	47	5.62	2.53	5.17	69	5.7	0.66	2.1	0.2
R104	75	25.323	36.43	11.107	12.41	2.46737	1	2	2	1	1	侵及肾盂					1	1	9	16	46.3	7.37	1.6	5.13	70	4.49	0.59	2.2	7.5
R105	76	24.4045	35.66	11.2555	12.41	2.22611	2	1	2	1	1						1	1	17	20	43.2	5.31	1.48	5.21	54	5.8	0.67	6.4	7.9
R106	77	24.283	36.67	12.387	12.41	1.01609	1	2	2	1	1						1	1	11	8	40.3	3.52	0.72	5.09	95	7.71	0.67	2.2	6.3
R107	78	24.9723	37.4933	12.5209	12.41	0.926003	2	2	1	1	1						1	1	84	32	45.3	2.693	1.04	5.11	75	3.4	0.76	9.5	25.1
R109	79	25.55	39.99	14.44	12.41	0.244855	1	2	3	2	2						1	1	9	13	43.1	3	0.49	5.04	70	3.8	0.72	1.6	4
R110	80	24.7833	35.5	10.7167	12.41	3.23402	1	2	3	2	2	侵及肾盂	局灶性侵及肾被膜			肾静脉及下腔静脉癌栓形成	3	2	17	12	39.5	2.79	0.95	5.04	129	7.9	1.26	0.9	1
R114	81	25.5019	36.8529	11.3509	12.41	2.08358	1	1	1	1	1						1	1	32	20	43.4	1.89	0.99	4.11	70	6.65	0.94	34.9	87.7
R115	82	24.0445	36.9333	12.8889	12.41	0.717534	2	1	2	1	1						1	1	12	20	47.3	4.96	0.98	4.58	63	7.22	0.8	12.4	8.1
R118	83	22.4611	34.16	11.6989	12.41	1.63703	1	2	2	1	1						1	1	33	28	41.1	4.2	3.12	5.1	87	8.72	0.8	2.2	10.9
R120	84	23.2013	35.56	12.3587	12.41	1.03617	1	2	1	1	2						1	1	20	16	42.8	4.86	1.09	5.69	57	5.14	0.64	3.6	1.5
R121	85	22.9814	35.21	12.2286	12.41	1.13401	1	2	2	1	2						2	1	16	17	40.3	3.73	1.64	4.74	94	7.46	0.92	1	0.5
R122	86	23.2307	33.67	10.4393	12.41	3.91956	1	1	2	2	2						1	2	51	27	40.8	7.5	1.41	5.56	73	4.7	0.62	13.6	5.2
R123	87	23.0404	35.22	12.1796	12.41	1.17313	2	2	2	1	1		紧邻肾被膜				1	1	22	17	45.8	3.71	1.06	4.38	87	8.2	2.06	18.3	3.9
R124	88	23.5491	34.77	11.2209	12.41	2.28014	1	1	2	1	2						2	1	21	23	49.1	4.89	1.98	4.99	70	3.57	0.75	1.1	1
R125	89	23.2529	39.7524	16.4995	12.41	0.0587411	1	1	1	1	2					肾静脉癌栓	1	1	31	24	50.9	2.2	0.82	4.93	78	5.4	0.69	0.6	2.5
R126	90	23.2149	34.27	11.0551	12.41	2.55783	1	2	2	1	2		侵及被膜	与脂肪囊紧密相连			2	1	5	11	37	6.47	4.37	6.47	82	8.68	2.27	2.3	10
R127	91	23.5214	35.27	11.7486	12.41	1.58166	2	1	2	1	1						1	1	13	17	43.3	5.73	1.28	5	49	5.26	0.54	7.6	13.3
R131	92	23.4725	35.55	12.0775	12.41	1.25915	1	1	2	1	1		侵及肾被膜				1	1	46	34	46.4	4	1.85	7.44	53	4.52	0.51	2.3	1.5
R133	93	23.939	35.17	11.231	12.41	2.26421	1	2	2	1	2						4	2	5	12	42	3.65	1.31	5.23	68	5.58	0.88	2.1	7
R134	94	22.4673	33.42	10.9527	12.41	2.74585	1	2	2	1	2		侵及肾被膜				1	1	76	55	42.7	4.89	1.13	4.85	78	7.46	0.74	2	3.2
R135	95	23.2609	33.12	9.85913	12.41	5.85987	2	1	2	1	1						1	2	16	14	48.1	4.69	0.87	8.06	20	3.99	0.52	6.3	24
R136	96	23.1621	34.33	11.1679	12.41	2.36542	1	1	2	1	1						1	1	18	19	45.7	4.1	0.7	5.48	70	4.72	0.65	4	2.9
R137	97	23.3034	35.65	12.3466	12.41	1.04495	1	1	2	1	1		紧邻肾被膜				1	1	66	40	47.6	4.24	1.3	4.91	75	7.77	0.67	5.1	149.6
R138	98	23.1483	33.76	10.6117	12.41	3.47822	1	1	1	1	1						1	1	32	22	45.7	7.12	2.13	7.1	80	7.6	0.65	5.4	29.8
R139	99	23.1669	35.18	12.0131	12.41	1.31668	1	2	2	1	1						1	1	15	21	45.3	2.7	0.58	4.61	88	3.7	0.82	6.6	10.7
R140	100	22.9797	33.98	11.0003	12.41	2.65685	2	2	3	2	1						1	1	10	13	41.5	5.19	1.53	7.8	48	7.41	0.74	8.5	10.6
R142	101	23.1194	32.56	9.44061	12.41	7.83206	1	1	1	1	1		侵及肾被膜				1	2	15	18	45.2	3.53	0.74	4.54	64	3.45	0.73	4.5	4.5
R144	102	23.0812	34.66	11.5788	12.41	1.77913	1	1	1	1	1						1	1	24	20	49.5	4.71	1.39	4.85	63	5.01	0.56	6.6	7.5
R145	103	22.6553	35.17	12.5147	12.41	0.929968	2	2	2	1	1						1	1	13	18	40.6	6.96	3.07	5.42	111	7.88	0.54	97.3	31.2
R147	104	22.9137	35.66	12.7463	12.41	0.79209	2	1	2	1	1						1	1	10	12	48.8	2.85	0.85	6.07	50	3.1	0.61	97	19.2
R148	105	23.1408	34.76	11.6192	12.41	1.73004	1	1	2	1	2						1	1	15	12	44.9	5.37	1.35	4.94	70	5	0.78	1.8	8.2
R149	106	22.8431	34.56	11.7169	12.41	1.61676	1	2	2	1	2						1	1	23	16	44.1	3.87	5.49	9.26	89	7.7	1.31	38.9	9.1
R150	107	22.4465	34.56	12.1135	12.41	1.22819	1	1	2	1	1						1	1	22	14	37.2	3.65	0.38	5.08	70	4.82	0.77	82.2	2.2
R152	108	23.0111	34.27	11.2589	12.41	2.22079	1	1	2	1	1		紧邻肾被膜				1	1	17	19	55	4.97	0.84	4.87	72	4.86	0.62	11.5	10

## Sheet: Control group
							Hepatic Function
Sample Number	Age	miR484	mi155	ΔCT	Median	2-ΔΔCT	ALT	ALB	AST	CHO	TG
1	45	26.6	39.89	13.29	12.41	0.543353	19	43.5	20	4.31	0.55
2	40	25.8137	39.12	13.3063	12.41	0.53727	12	47.4	16	3.83	0.75
3	45	25.8344	37.88	12.0456	12.41	1.28733	17	47.1	19	5.23	1.11
4	40	23.11	39.99	16.88	12.41	0.0451228	11	47.3	14	4.43	0.74
5	39	27.0136	38.33	11.3164	12.41	2.13402	12	49.4	14	4.29	0.78
6	40	26.3711	38.11	11.7389	12.41	1.59225	10	49	18	4.43	0.42
7	40	25.294	37.66	12.366	12.41	1.03094	14	47.6	16	4.79	0.66
8	40	25.1215	36.88	11.7585	12.41	1.5708	15	48.1	25	4.4	0.64
9	45	25.8171	39.48	13.6629	12.41	0.419599	13	46.6	20	5.4	1.37
10	43	25.7728	39.88	14.1072	12.41	0.308388	13	45.6	14	4.76	0.94
11	44	26.3708	39.45	13.0792	12.41	0.628846	11	51.8	14	4.5	0.8
12	40	23.9977	39.09	15.0923	12.41	0.15579	11	47.5	13	4.58	0.5
13	41	23.9735	35.44	11.4665	12.41	1.92313	10	50.2	18	4.07	0.41
14	43	24.1277	39.98	15.8523	12.41	0.0919919	21	45.3	16	4.44	1.54
15	38	23.5472	38.88	15.3328	12.41	0.131875	30	48.2	21	3.76	1.11
16	40	24.6818	38.09	13.4082	12.41	0.500617	9	51.2	14	3.73	0.82
17	44	24.848	38.56	13.712	12.41	0.40555	11	45.9	19	4.85	1
18	38	24.734	38.67	13.936	12.41	0.347235	12	47.7	14	4.52	0.66
19	45	24.7454	35.77	11.0246	12.41	2.6125	7	50.8	18	3.75	0.73
20	44	23.8857	39.67	15.7843	12.41	0.0964333	36	47.2	30	5.13	1.38
21	45	24.6665	36.3	11.6335	12.41	1.713	22	48.7	23	4.68	0.91
22	45	23.7022	39.08	15.3778	12.41	0.127825	19	51	21	4.79	0.55
23	39	24.5386	39.67	15.1314	12.41	0.151627	12	52.5	21	4.93	0.79
24	43	25.6747	39.34	13.6653	12.41	0.418917	22	47.4	21	3.79	0.5
25	43	26.2165	39.88	13.6635	12.41	0.419417	16	47.8	24	4.75	0.67
26	44	26.1563	39.66	13.5037	12.41	0.468552	12	49.3	17	3.7	0.6
27	38	26.242	37.44	11.198	12.41	2.3166	7	44.9	11	4.31	0.58
28	44	26.1095	37.45	11.3405	12.41	2.09866	15	47.2	20	3.95	0.75
29	40	26.2773	38.56	12.2827	12.41	1.09226	13	45.2	14	3.22	1
30	38	26.7092	39.56	12.8508	12.41	0.736724	16	48.3	21	4.09	0.54
31	39	25.8976	37.66	11.7624	12.41	1.56651	20	46.1	17	4.09	0.96
32	45	25.9351	39.08	13.1449	12.41	0.600872	10	43.3	17	3.63	1.08
33	39	25.34	37.66	12.32	12.41	1.06437	14	49	20	4.17	1.43
34	45	25.7246	39.98	14.2554	12.41	0.278277	13	50.7	25	5.46	0.97
35	41	26.0018	38.11	12.1082	12.41	1.23272	26	43.9	19	4.26	1.02
36	39	27.6475	39.49	11.8425	12.41	1.48191	12	43.3	18	4.02	0.93
37	38	26.5911	39.9	13.3089	12.41	0.536301	18	45.3	20	4.75	0.53
38	45	28.019	39.09	11.071	12.41	2.52972	11	46.2	18	5.18	1.2
39	42	27.5428	39.07	11.5272	12.41	1.8439	12	47.3	13	4.25	0.61
40	42	27.4357	39.88	12.4443	12.41	0.976472	12	47.5	14	4.03	1.57
41	39	27.22	39.98	12.76	12.41	0.784592	6	50.2	16	4.34	1.06
42	38	26.859	37.98	11.121	12.41	2.44363	9	47.6	16	4.27	0.79
43	38	25.8971	39.76	13.8629	12.41	0.36528	12	45.5	17	4.37	1.66
44	43	26.2559	39.99	13.7341	12.41	0.399399	16	45.9	20	4.44	0.6
45	45	26.9453	39.98	13.0347	12.41	0.648566	12	47.9	19	3.87	0.93
46	41	24.1118	35.55	11.4382	12.41	1.96131	16	46.1	18	4.69	1.69
47	39	24.7173	39.09	14.3727	12.41	0.256551	13	46.4	18	4.69	1.07
48	38	23.962	39	15.038	12.41	0.161768	9	45.7	14	3.47	0.77
49	41	25.0918	38.09	12.9982	12.41	0.665176	16	45.4	14	4.92	1.51
50	40	24.6484	36.08	11.4316	12.41	1.97026	15	45	17	4.13	1.01
51	41	24.8523	38.97	14.1177	12.41	0.306157	12	48.6	16	4.9	0.8
52	40	24.6633	38.29	13.6267	12.41	0.430274	9	44.3	13	4.04	0.73
53	38	25.3819	39.08	13.6981	12.41	0.409502	10	48.1	20	4.7	0.97
54	43	23.9245	38.99	15.0655	12.41	0.158708	10	45.4	16	5.15	0.87
55	43	23.0813	39.87	16.7887	12.41	0.0480694	17	46.3	16	5.03	1.03
56	39	22.8614	39.09	16.2286	12.41	0.0708753	15	47.9	24	4.59	0.99
